# Supplementary material for: A refined phase diagram of the tert-butanol–water system and implications on lyophilization process optimization of pharmaceuticals
Source: Royal Society of Chemistry journal article supplement (doi:10.1039/c9cp06576h), 2020-01-01
Supplement: c9cp06576h1.pdf [file c9cp06576h1.pdf]

## Electronic Supplementary Material

### A refined phase diagram of tert-butanol – water system and implications on lyophilization process optimization of pharmaceuticals

Bakul S. Bhatnagar<sup>a,e</sup>, Jayesh Sonje<sup>a</sup>, Evgenyi Y. Shalaev<sup>c,d</sup>, Susan W. H. Martin<sup>b</sup>, Dirk L. Teagarden<sup>b</sup>, and Raj Suryanarayanan<sup>a</sup>

<sup>a</sup>Department of Pharmaceutics, College of Pharmacy, 308 Harvard St. SE,  
University of Minnesota, Minneapolis, MN 55455, USA

<sup>b</sup>Pfizer Biotherapeutics, Pfizer Inc., St. Louis, MO, USA

<sup>c</sup>Pfizer Groton Laboratories, Eastern point Road, Pfizer Inc., Groton, CT 06340, USA

<sup>d</sup>Pharmaceutical development, Allergan Inc, Irvine, CA, USA.

<sup>e</sup>Pfizer Biotherapeutics, Pfizer Inc., Andover, MA, USA

*Correspondence to:* Raj Suryanarayanan, PhD

Telephone: (612) 624-9626 Fax: (612) 626-2125

Email: [surya001@umn.edu](mailto:surya001@umn.edu)

Data points for phase diagram:

The determination of zero heating rate relevant calculations are mentioned in *table S1*.

*Table S1*: Determination of zero heating rate

| <b>Data from experiments on unannealed solutions</b> |                     |                                                               |                                                                                |                                                                              |                          |                                                        |
|------------------------------------------------------|---------------------|---------------------------------------------------------------|--------------------------------------------------------------------------------|------------------------------------------------------------------------------|--------------------------|--------------------------------------------------------|
| <b>TBA, % w/w</b>                                    | <b>Water, % w/w</b> | <b>Eutectic melting temp from unannealed systems - 2C/min</b> | <b>Eutectic melting temp from unannealed systems - extrapolated to 0°C/min</b> | <b>Equation from the unannealed data extrapolated to a zero-heating rate</b> | <b>Correction factor</b> | <b>Calculated eutectic melt for annealed solutions</b> |
| 2.5                                                  | 97.5                | -7.81 ± 0.06                                                  | -8.56 ± 0.04                                                                   | y = 0.3742x - 8.5583                                                         | -0.75                    | -8.20                                                  |
| 5                                                    | 95                  | -7.61 ± 0.12                                                  | -8.36 ± 0.00                                                                   | y = 0.3789x - 8.3552                                                         | -0.75                    | -7.9                                                   |
| 10                                                   | 90                  | -6.92±0.06                                                    | -8.20±0.03                                                                     | y = 0.6724x - 8.2001                                                         | -1.28                    | -7.40                                                  |
| 15                                                   | 85                  | -6.40±0.25                                                    | -8.19±0.09                                                                     | y = 0.9029x - 8.1921                                                         | -1.79                    | -7.81                                                  |
| 20                                                   | 80                  | -5.93±0.19                                                    | -8.17±0.01                                                                     | y = 1.1537x - 8.1713                                                         | -2.24                    | -8.17                                                  |
| 25                                                   | 75                  | -5.89±0.07                                                    | -8.17±0.09                                                                     | y = 1.1669x - 8.1712                                                         | -2.28                    | -8.17                                                  |
